# Supplementary figures and images for: Efficacy and safety of neoadjuvant sintilimab, oxaliplatin and capecitabine in patients with locally advanced, resectable gastric or gastroesophageal junction adenocarcinoma: early results of a phase 2 study
Source: PubMed Central journal article supplement — J Immunother Cancer. 2022 Mar 16;10(3):e003635. doi: 10.1136/jitc-2021-003635 (PMC8928365; doi:10.1136/jitc-2021-003635), 2022-03-16

## CONSORT 2010 Flow Diagram

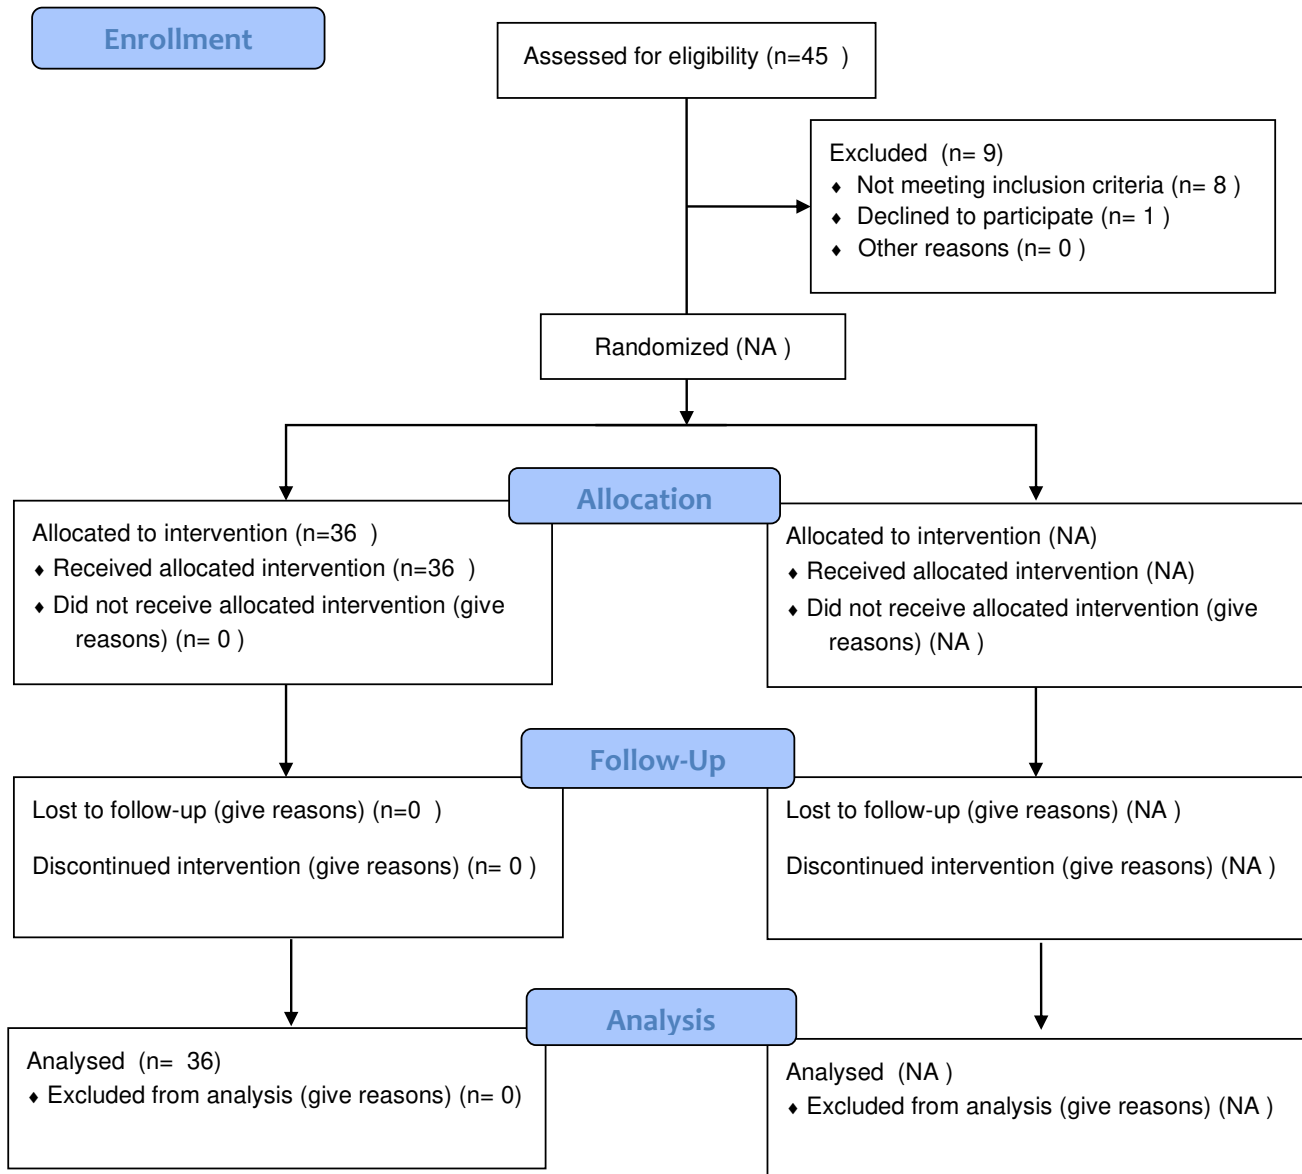

Supplement: jitc-2021-003635supp001.pdf [file jitc-2021-003635supp001.pdf]
